# Supplementary material for: A novel method for artificial antigen synthesis and preparation of a polyclonal antibody for the sensitive determination of leucomalachite green in fish samples by enzyme-linked immunoassay
Source: Royal Society of Chemistry journal article supplement (doi:10.1039/c6ay01564f), 2016-01-01
Supplement: c6ay01564f1.pdf [file c6ay01564f1.pdf]

**A novel method for artificial antigen synthesis and preparation of a polyclonal antibody for the sensitive determination of leucomalachite green in fish samples by enzyme-linked immunoassay**

Dan Zhu<sup>a</sup>, Yang Mu<sup>b</sup>, Qiangqiang Li<sup>a</sup>, Xiumei Pang<sup>a</sup>, Xue Wang<sup>a</sup>, Yue Liu<sup>a</sup>, Gang Chen<sup>\*a</sup> and He Chen<sup>\*c</sup>

Supplemental Material

**Synthesis and characterization of the hapten**

Various haptens with different spacer arms were synthesized. The specific synthetic scheme was depicted in Figure S1. The NMR and MS spectroscopic results for confirmation of the synthesized LMG hapten I-IV were shown in Figure S2, Figure S3, Figure S4 and Figure S5.

**Sensitivities of the antibodies against LMG**

Sensitivity comparison of antibodies developed from different haptens. All of the antibodies developed by different haptens were in the same immunological approach. All of the antiserum obtained were optimized and measured according to the steps described in the article. The sensitivity comparison was shown in table S1.

**LC-MS/MS procedure**

Mobile phases A and B were methanol and water containing 0.1% of formic acid, respectively. The gradient elution program was used as showed in table S2. The injection volume was 5  $\mu$ L and the flow rate was 0.30 mL/min. The ionization source parameters were listed as follows: capillary voltage, 1.0 kV; cone voltage, 31.0 V; and cone gas flow, 50 L/h. Other MS/MS conditions were used as follows: source temperature, 110°C; desolvation temperature, 400°C; desolvation gas flow, 600 L/h; curtain gas, 15 psi, collision gas, 30 psi. The mass conditions for LMG was optimized during infusion.

The mass spectrum of LMG standard solution (500 µg/L) in scan mode was shown in Figure S 8. Some mass parameters including precursor and product ions, collision energy, dwell time etc. were shown in Table S3. In addition, the chromatogram of the LMG standard solution (10 µg/L) was shown in Figure S9.

Table S1 Sensitivity comparison of the antibodies prepared by hapten I~IV

| Type of hapten | Type of the antibody | Antibody dilution | Coating antigen | IC <sub>50</sub> (ng/mL) |
|----------------|----------------------|-------------------|-----------------|--------------------------|
| hapten I       | antibody I           | 1:7000            | hapten I        | 2.2                      |
| hapten II      | antibody II          | 1:3000            | hapten I        | 22.3                     |
| hapten III     | antibody III         | 1:5000            | hapten I        | 8.9                      |
| hapten IV      | antibody IV          | 1:5000            | hapten I        | 12.9                     |

Table S2

Gradient elution condition for HPLC

| Time (min) | Flow rate (mL/min) | Methanol (%) | Water (0.1% of formic acid, %) |
|------------|--------------------|--------------|--------------------------------|
| 0          | 0.25               | 10           | 90                             |
| 2          | 0.25               | 50           | 50                             |
| 7          | 0.25               | 90           | 10                             |
| 10         | 0.25               | 90           | 10                             |
| 10.1       | 0.25               | 10           | 90                             |
| 18         | 0.25               | 10           | 90                             |

Table S3

Multiplex reaction monitoring conditions for leucomalachite green.

| Compound      | Q1 (m/z) | Q3(m/z) | Collision energy (eV) | Dwell time (s) |
|---------------|----------|---------|-----------------------|----------------|
| Isometamidium | 331.6    | 239.3   | 30                    | 0.3            |
|               |          | 315.7   | 36                    | 0.3            |
|               |          | 272.3   | 40                    | 0.3            |

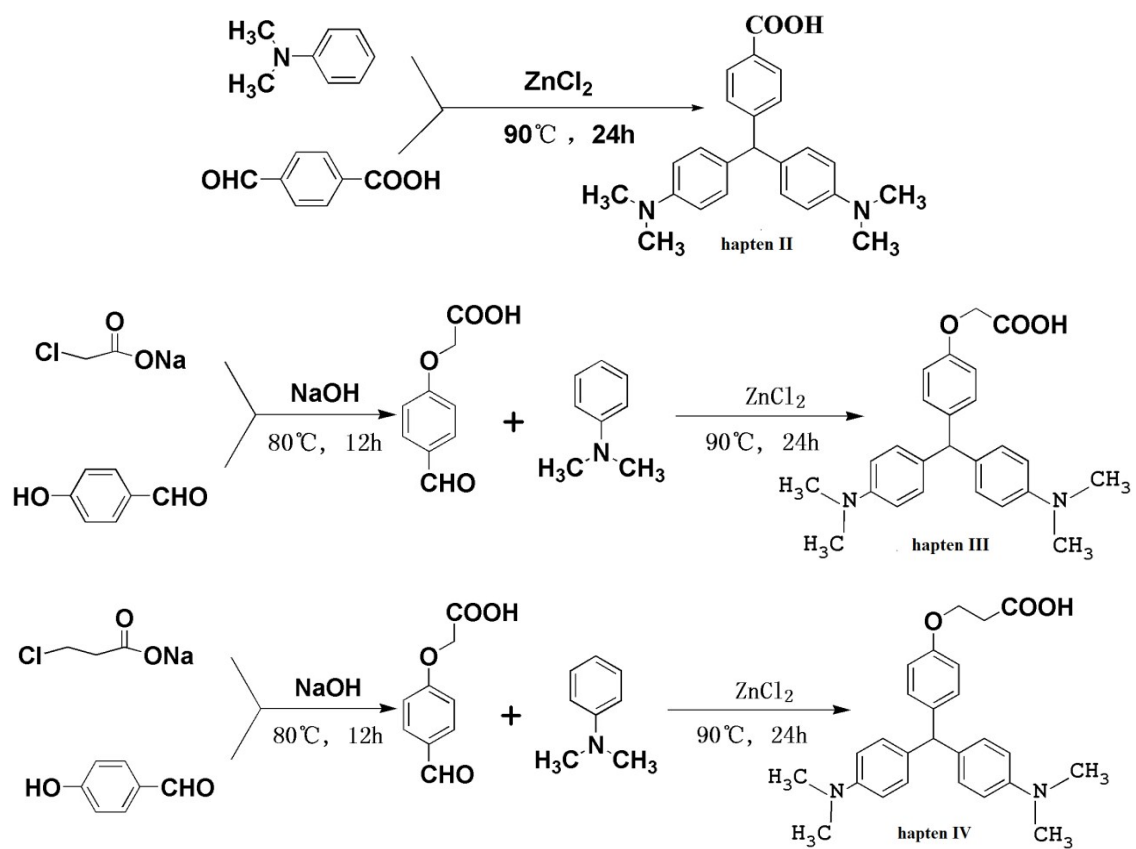

Figure S1. Synthetic scheme for the synthesis of LMG hapten II~IV.

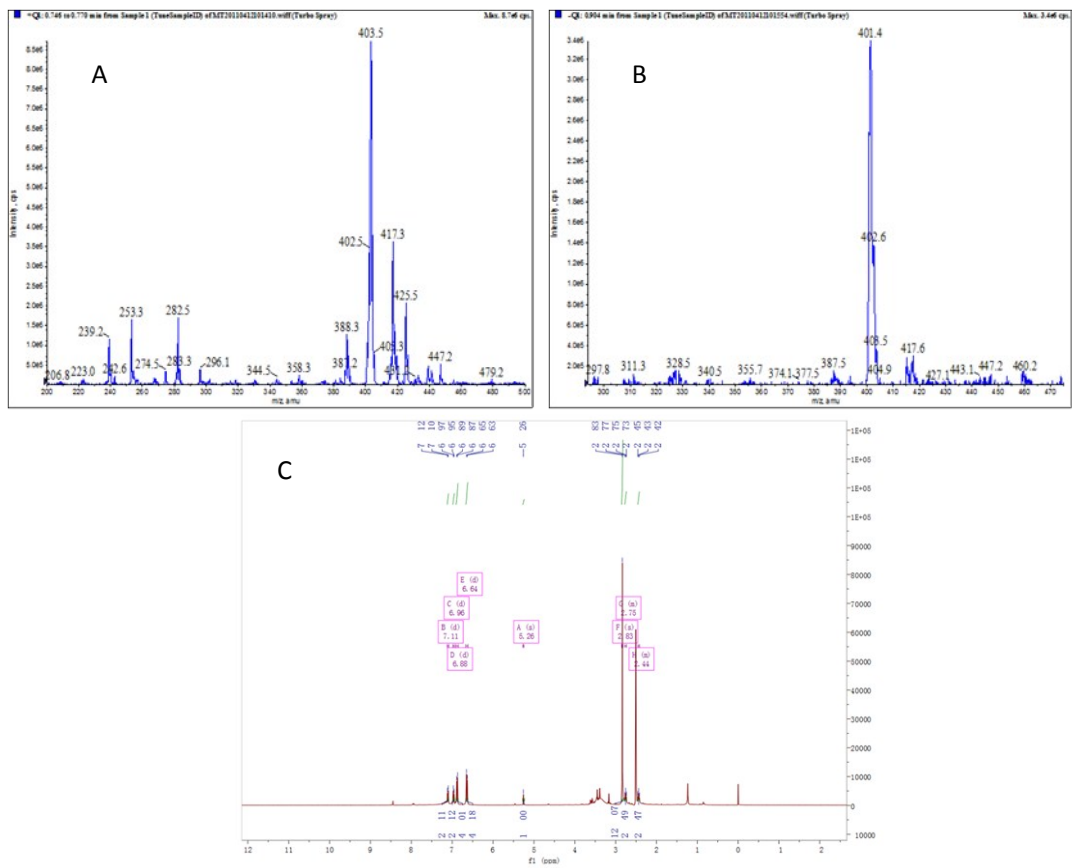

Figure S2. The results of leucomalachite green hapten I (A- The mass spectrogram in positive mode; B- The mass spectrogram in negative mode; C-The NMR spectrum).

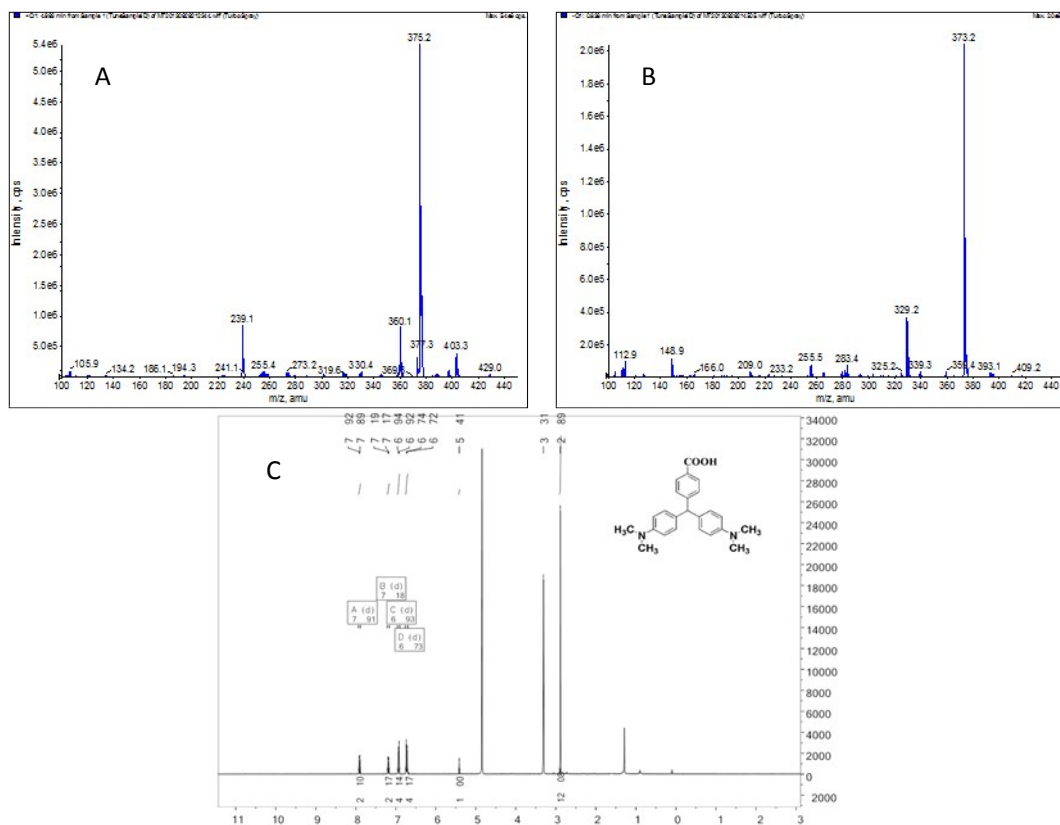

Figure S3. The results of leucomalachite green hapten II (A- The mass spectrogram in positive mode; B- The mass spectrogram in negative mode; C-The NMR spectrum).

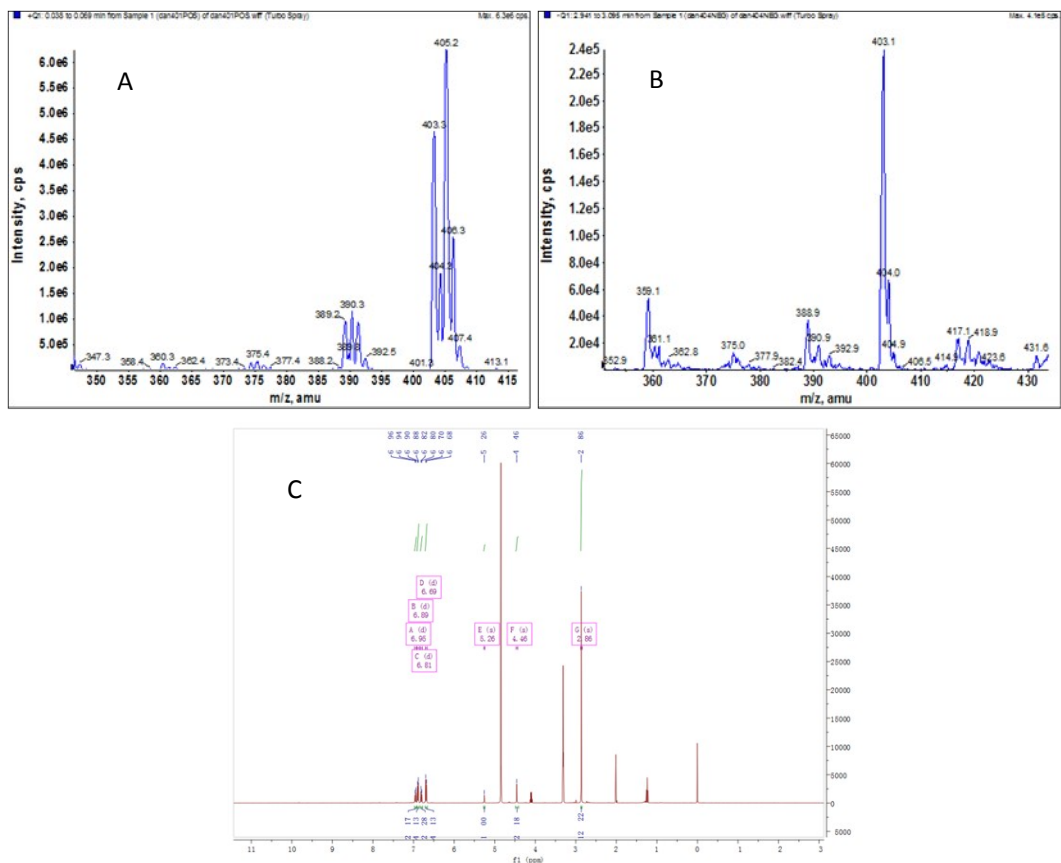

Figure S4. The results of leucomalachite green hapten III (A- The mass spectrometry in positive mode; B- The mass spectrometry in negative mode; C- The NMR spectrum).

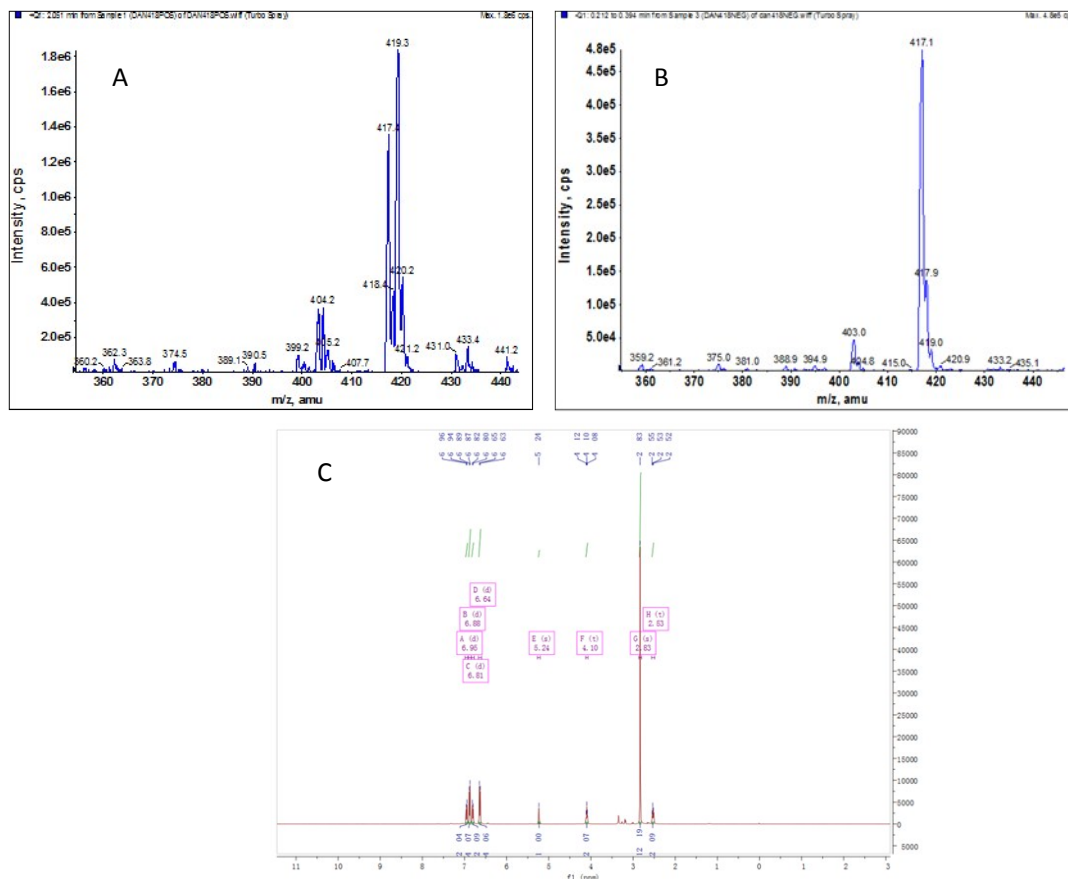

Figure S5. The results of leucomalachite green hapten IV (A- The mass spectromogram in positive mode; B- The mass spectromogram in negative mode; C-The NMR spectrum).

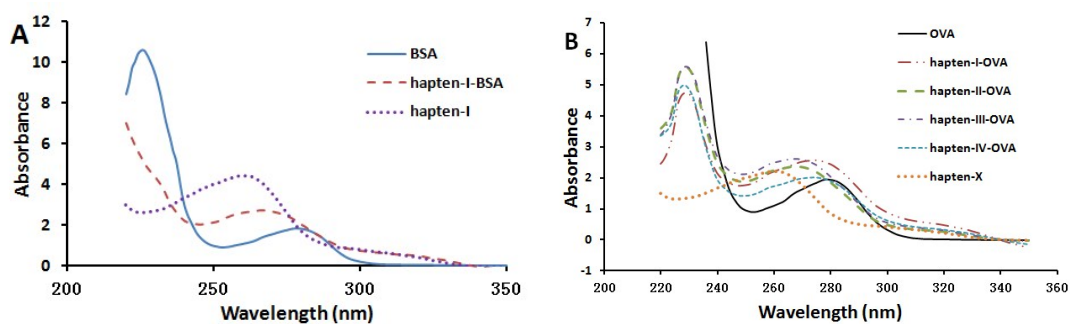

Figure S6. (A) UV spectra of LMG hapten I, BSA and immunogen hapten I-BSA. (B) UV spectra of LMG hapten I~IV (hapten-X), OVA and coating antigens hapten I-OVA, hapten II-OVA, hapten III-OVA, hapten IV-OVA.



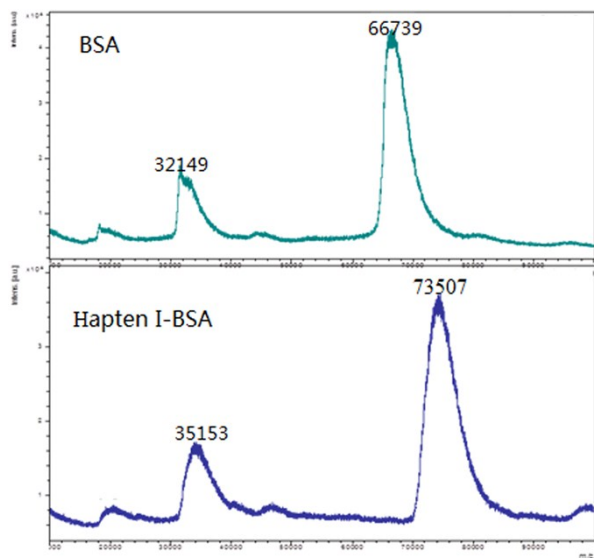

Figure S7. Mass spectra of the BSA and immunogen hapten I-BSA

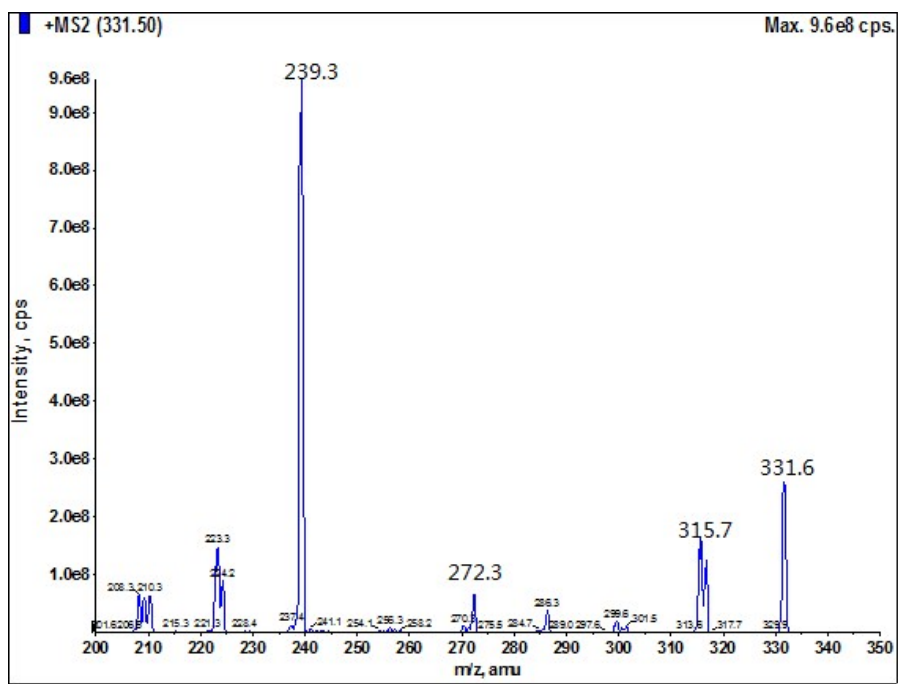

Figure S8. The product Ion spectrum of leucomalachite green at 500 µg/L.

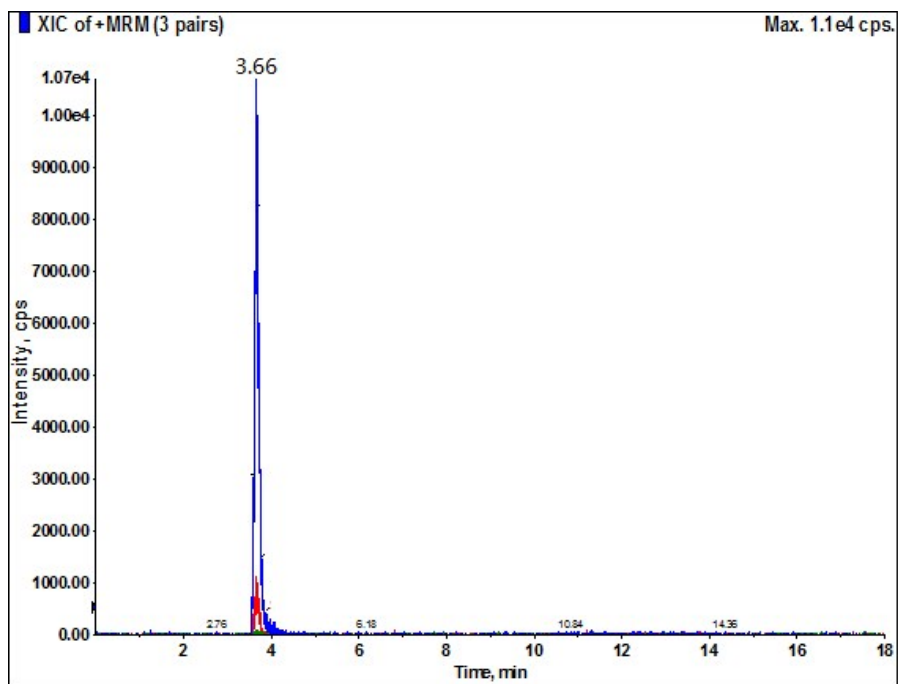

Figure S9. The MRM chromatogram of the leucomalachite green standard solution at 10  $\mu\text{g/L}$ .
